# Supplementary material for: Moving beyond post hoc explainable artificial intelligence: a perspective paper on lessons learned from dynamical climate modeling
Source: Copernicus journal article supplement (doi:10.5194/gmd-18-787-2025), 2025-02-11
Supplement: Supplementary file 1 [file gmd-18-787-2025-supplement.zip]

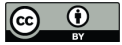

*Supplement of*

## **Moving beyond post hoc explainable artificial intelligence: a perspective paper on lessons learned from dynamical climate modeling**

**Ryan J. O’Loughlin et al.**

*Correspondence to:* Ryan J. O’Loughlin ([ryan.oloughlin@qc.cuny.edu](mailto:ryan.oloughlin@qc.cuny.edu))

- [gmd-18-787-2025-supplement-title-page.pdf](#)
- [Data description\\_RO.pdf](#)
- [wos\(AI\).xls](#)

The copyright of individual parts of the supplement might differ from the article licence.
